# Supplementary material for: Solvothermal synthesis of hair-like carbon nanotubes onto sub-micron-sized spherical metal oxide catalyst cores
Source: Royal Society of Chemistry journal article supplement (doi:10.1039/d3ra00770g), 2023-01-01
Supplement: d3ra00770g1.pdf [file d3ra00770g1.pdf]

## Supplemental Information

# Solvothermal synthesis of hair-like carbon nanotubes onto sub-micron-sized spherical metal oxide catalyst cores

*Kazuya Kobiro,<sup>\*ab</sup> Hinako Kimura,<sup>a</sup> Saki Hirose,<sup>a</sup> Makoto Kinjo<sup>a</sup> and Hiroshi Furuta<sup>\*ac</sup>*

<sup>a</sup> Graduate School of Engineering, Kochi University of Technology, 185 Miyanokuchi, Tosayamada, Kochi 782-8502, Japan

<sup>b</sup> Center for Structural Nanochemistry, Research Institute, Kochi University of Technology, 185 Miyanokuchi, Tosayamada, Kochi 782-8502, Japan

<sup>c</sup> Center for Nanotechnology, Research Institute, Kochi University of Technology, 185 Miyanokuchi, Tosayamada, Kochi 782-8502, Japan

E-mail:

kobiro.kazuya@kochi-tech.ac.jp

furuta.hiroshi@kochi-tech.ac.jp

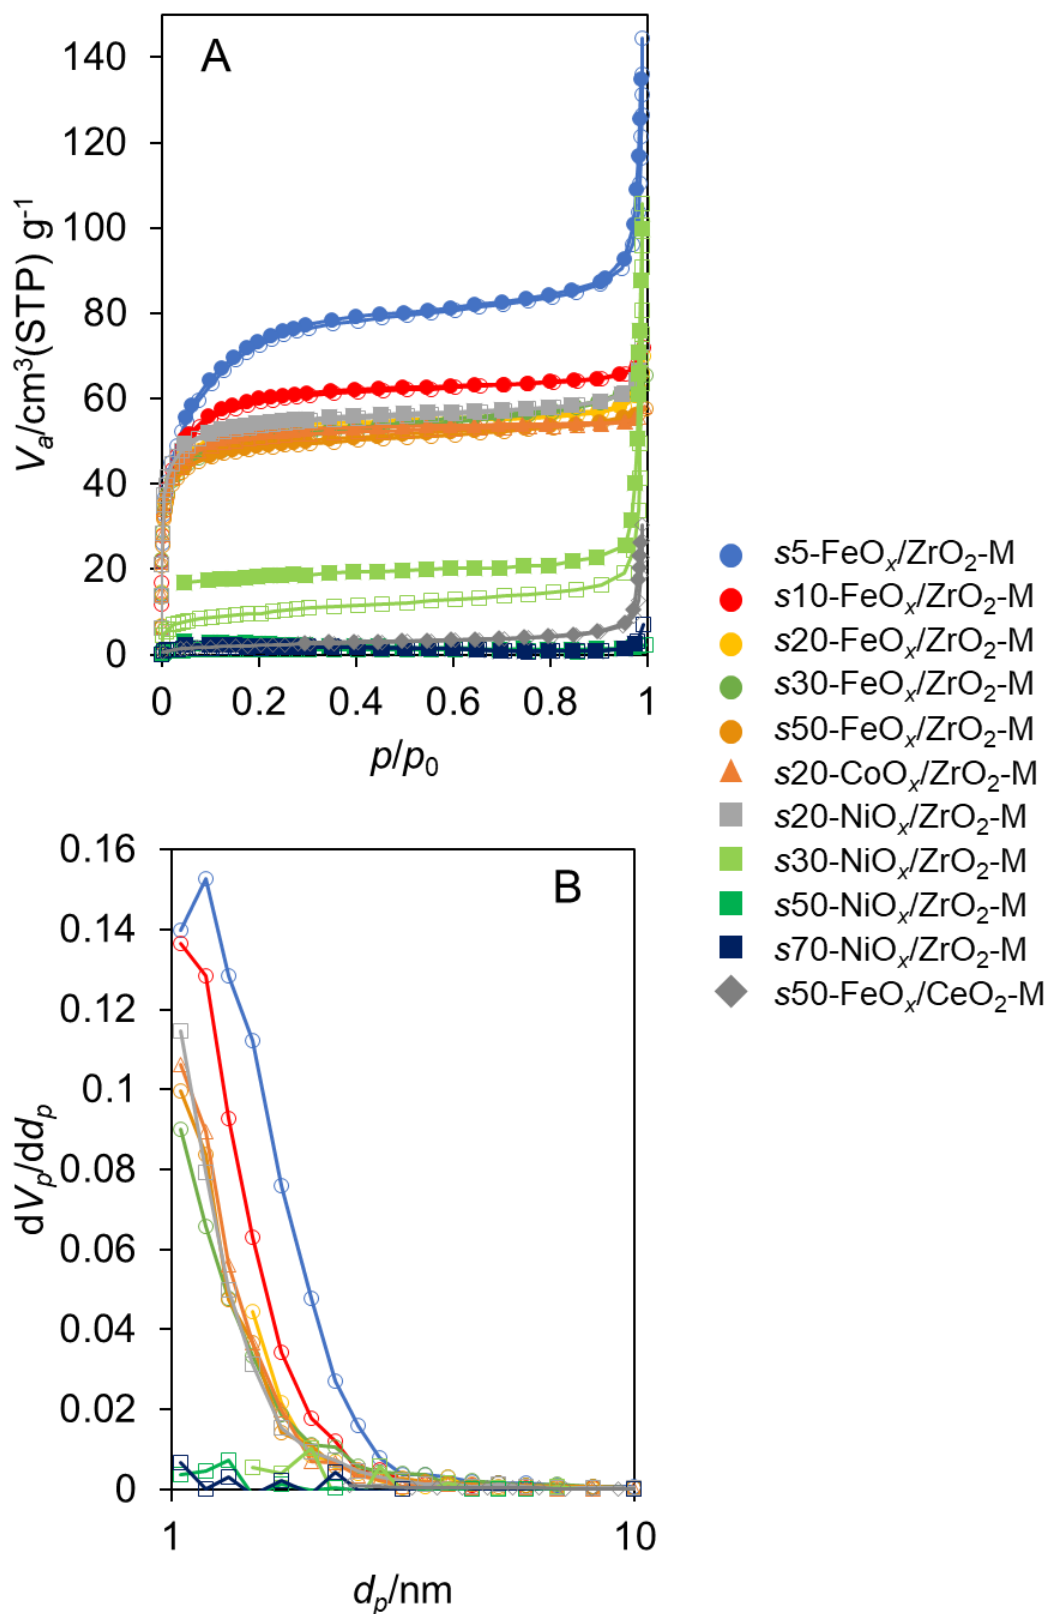

**Figure S1.** Nitrogen adsorption/desorption isotherms (A) and BJH plots (B) of s5-FeO<sub>x</sub>/ZrO<sub>2</sub>-M, s10-FeO<sub>x</sub>/ZrO<sub>2</sub>-M, s20-FeO<sub>x</sub>/ZrO<sub>2</sub>-M, s30-FeO<sub>x</sub>/ZrO<sub>2</sub>-M, s50-FeO<sub>x</sub>/ZrO<sub>2</sub>-M, s20-CoO<sub>x</sub>/ZrO<sub>2</sub>-M, s20-NiO<sub>x</sub>/ZrO<sub>2</sub>-M, s30-NiO<sub>x</sub>/ZrO<sub>2</sub>-M, s50-NiO<sub>x</sub>/ZrO<sub>2</sub>-M, s70-NiO<sub>x</sub>/ZrO<sub>2</sub>-M, and s50-FeO<sub>x</sub>/CeO<sub>2</sub>-M.

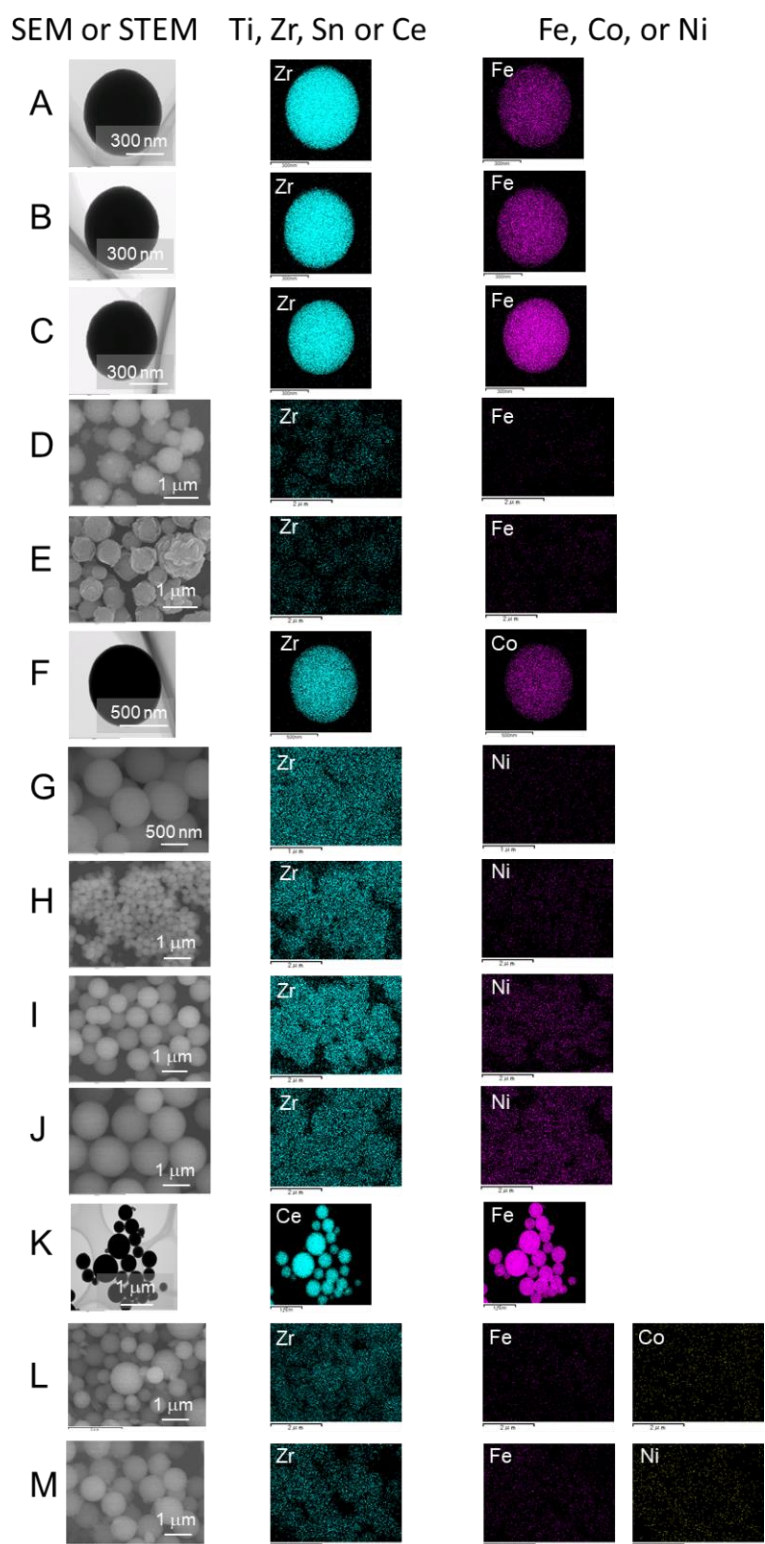

**Figure S2.** Elemental analysis of catalysts by STEM-EDX or SEM-EDX.

A)  $s_5\text{-FeO}_x/\text{ZrO}_2\text{-M}$ , B)  $s_{10}\text{-FeO}_x/\text{ZrO}_2\text{-M}$ , C)  $s_{20}\text{-FeO}_x/\text{ZrO}_2\text{-M}$ ,  
D)  $s_{30}\text{-FeO}_x/\text{ZrO}_2\text{-M}$ , E)  $s_{50}\text{-FeO}_x/\text{ZrO}_2\text{-M}$ , F)  $s_{20}\text{-CoO}_x/\text{ZrO}_2\text{-M}$ ,  
G)  $s_{20}\text{-NiO}_x/\text{ZrO}_2\text{-M}$ , H)  $s_{30}\text{-NiO}_x/\text{ZrO}_2\text{-M}$ , I)  $s_{50}\text{-NiO}_x/\text{ZrO}_2\text{-M}$ ,  
J)  $s_{70}\text{-NiO}_x/\text{ZrO}_2\text{-M}$ , K)  $s_{50}\text{-FeO}_x/\text{CeO}_2\text{-M}$ , L)  $s_{10}\text{-FeO}_x\text{-}s_{10}\text{-NiO}_x/\text{ZrO}_2\text{-M}$ ,  
and M)  $s_{10}\text{-FeO}_x\text{-}s_{10}\text{-CoO}_x/\text{ZrO}_2\text{-M}$ .

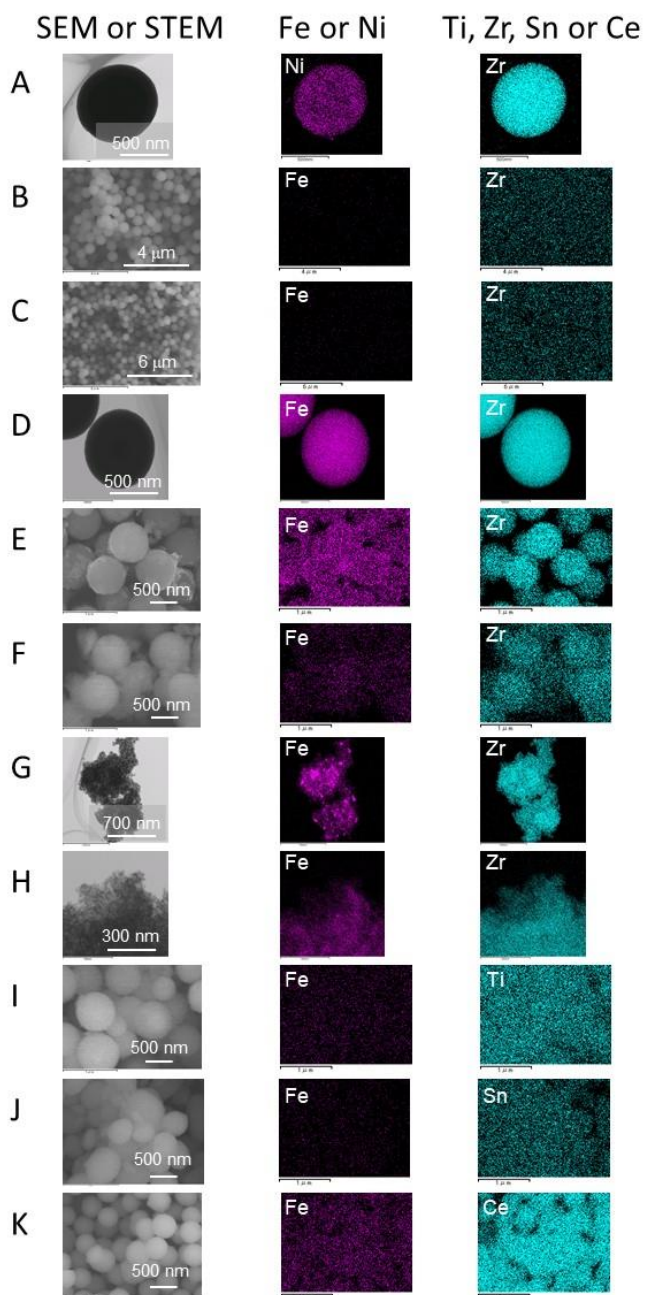

**Figure S3.** Elemental analysis of catalysts by STEM-EDX or SEM-EDX.

A)  $i8\text{-NiO}_x/\text{ZrO}_2\text{-M}$ , B)  $i5\text{-FeO}_x/\text{ZrO}_2\text{-M}$ , C)  $i10\text{-FeO}_x/\text{ZrO}_2\text{-M}$ , D)  $i20\text{-FeO}_x/\text{ZrO}_2\text{-M}$ , E)  $i30\text{-FeO}_x/\text{ZrO}_2\text{-M}$ , F)  $i50\text{-FeO}_x/\text{ZrO}_2\text{-M}$ , G)  $i20\text{-FeO}_x/\text{ZrO}_2\text{-W}$ , H)  $i20\text{-FeO}_x/\text{ZrO}_2\text{-U}$ , I)  $i20\text{-FeO}_x/\text{TiO}_2\text{-M}$ , J)  $i20\text{-FeO}_x/\text{SnO}_2\text{-M}$ , and K)  $i20\text{-FeO}_x/\text{CeO}_2\text{-M}$ .

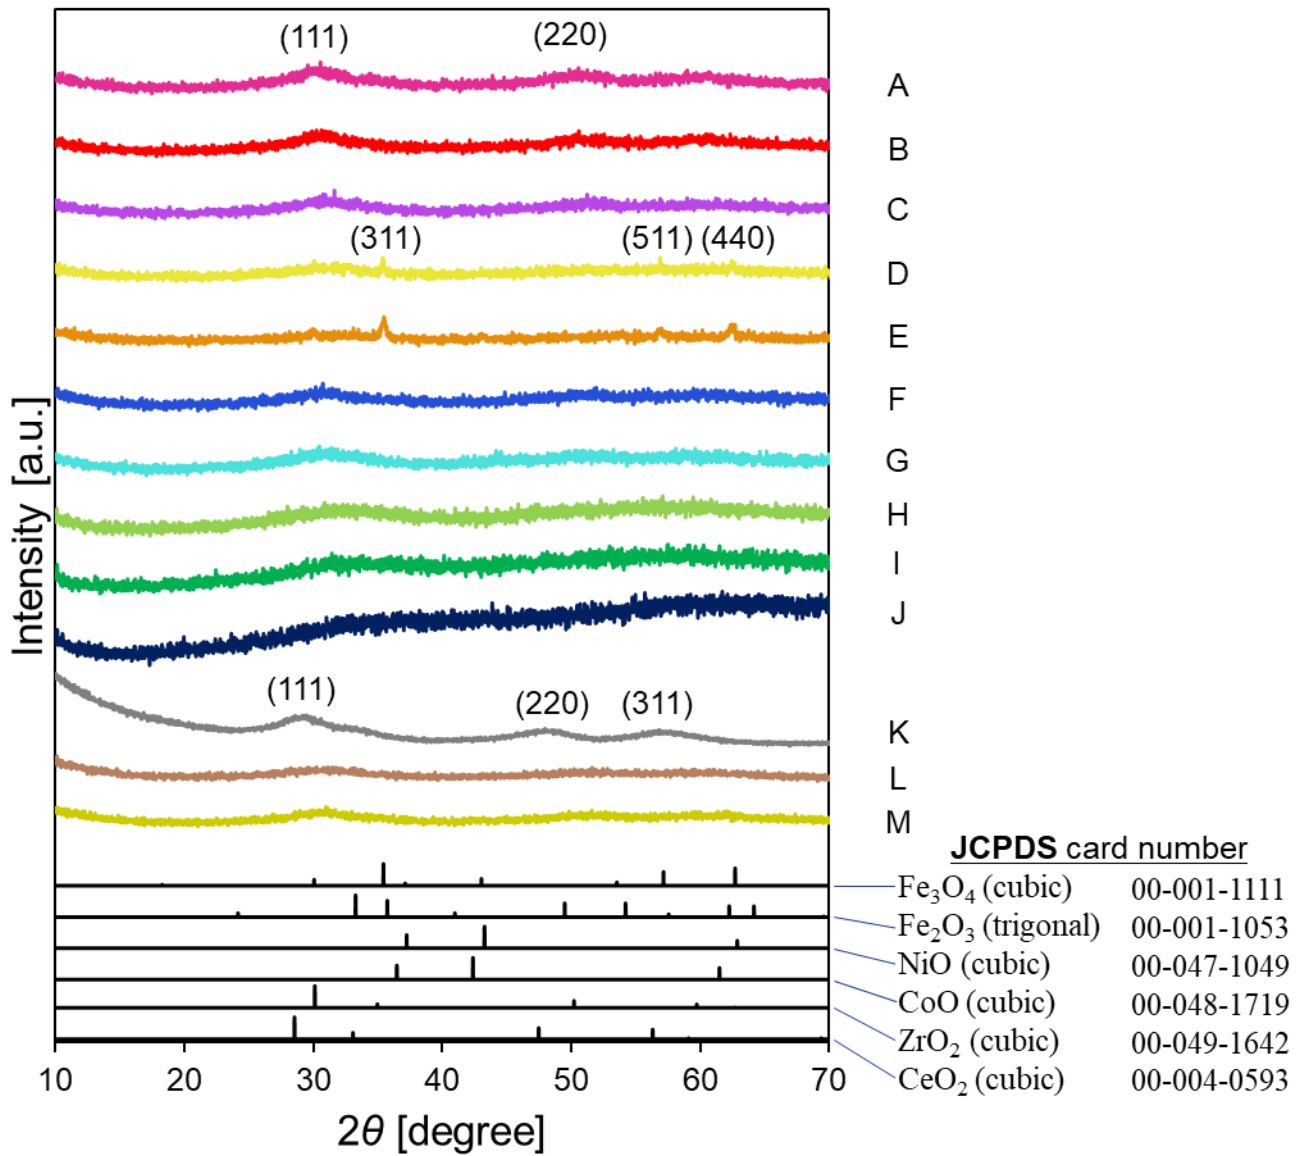

**Figure S4.** XRD spectra of embedded catalysts. A) *s*5-FeO<sub>x</sub>/ZrO<sub>2</sub>-M, B) *s*10-FeO<sub>x</sub>/ZrO<sub>2</sub>-M, C) *s*20-FeO<sub>x</sub>/ZrO<sub>2</sub>-M, D) *s*30-FeO<sub>x</sub>/ZrO<sub>2</sub>-M, E) *s*50-FeO<sub>x</sub>/ZrO<sub>2</sub>-M, F) *s*20-CoO<sub>x</sub>/ZrO<sub>2</sub>-M, G) *s*20-NiO<sub>x</sub>/ZrO<sub>2</sub>-M, H) *s*30-NiO<sub>x</sub>/ZrO<sub>2</sub>-M, I) *s*50-NiO<sub>x</sub>/ZrO<sub>2</sub>-M, J) *s*70-NiO<sub>x</sub>/ZrO<sub>2</sub>-M, K) *s*50-FeO<sub>x</sub>/CeO<sub>2</sub>-M, L) *s*10-FeO<sub>x</sub>-*s*10-NiO<sub>x</sub>/ZrO<sub>2</sub>-M, and M) *s*10-FeO<sub>x</sub>-*s*10-CoO<sub>x</sub>/ZrO<sub>2</sub>-M.

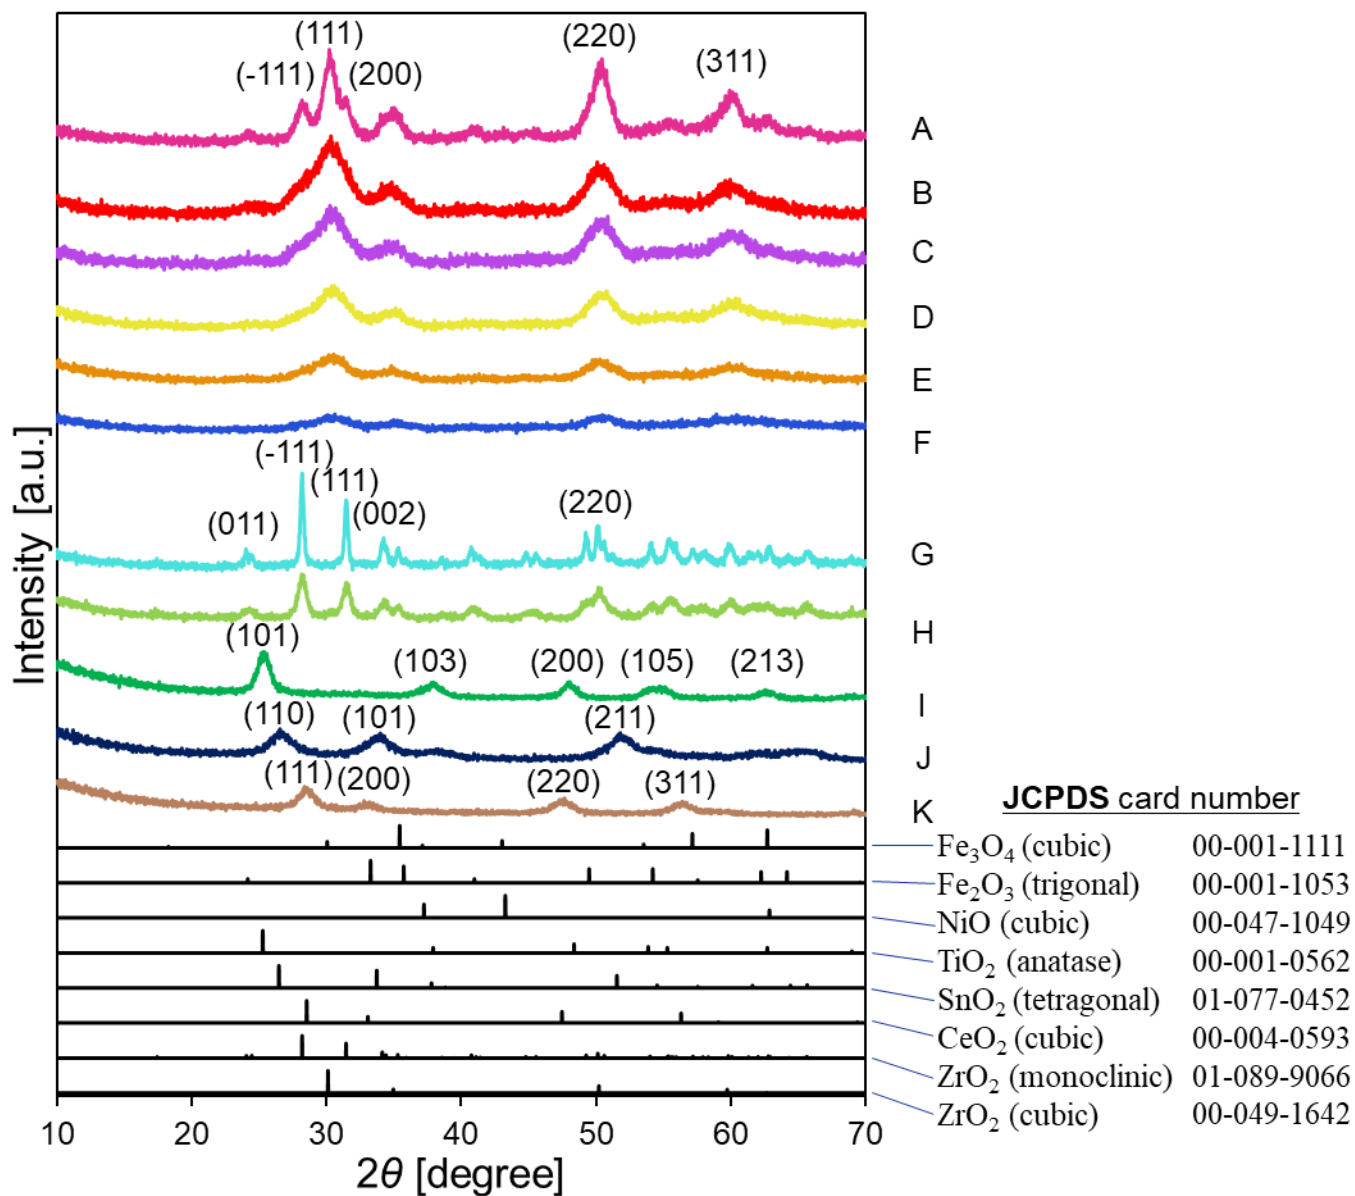

**Figure S5.** XRD spectra of impregnated catalysts. A) *i*8-NiO<sub>x</sub>/ZrO<sub>2</sub>-M, B) *i*5-FeO<sub>x</sub>/ZrO<sub>2</sub>-M, C) *i*10-FeO<sub>x</sub>/ZrO<sub>2</sub>-M, D) *i*20-FeO<sub>x</sub>/ZrO<sub>2</sub>-M, E) *i*30-FeO<sub>x</sub>/ZrO<sub>2</sub>-M, F) *i*50-FeO<sub>x</sub>/ZrO<sub>2</sub>-M, G) *i*20-FeO<sub>x</sub>/ZrO<sub>2</sub>-W, H) *i*20-FeO<sub>x</sub>/ZrO<sub>2</sub>-U, I) *i*20-FeO<sub>x</sub>/TiO<sub>2</sub>-M, J) *i*20-FeO<sub>x</sub>/SnO<sub>2</sub>-M, and K) *i*20-FeO<sub>x</sub>/CeO<sub>2</sub>-M).

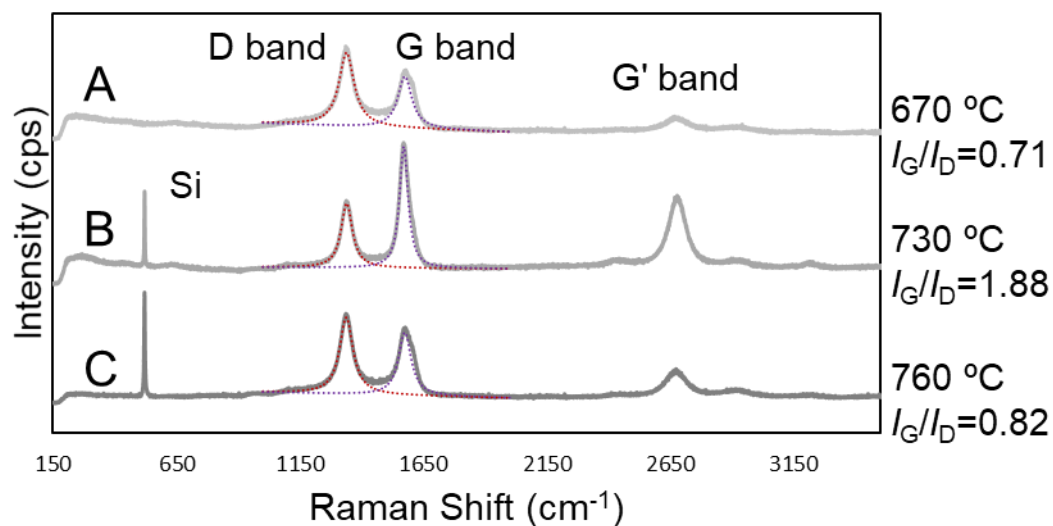

**Figure S6.** Raman spectra of CNT hair obtained at different temperature of A) 670°C, B) 730°C, and C) 760°C under  $<5.0 \times 10^{-4}$  Pa with 10 sccm ethyne gas flow for 10 s. The Si peaks at 520  $\text{cm}^{-1}$  were observed in both samples on the th-SiO<sub>2</sub> substrates on which MARIMO catalysts were drop-cast.

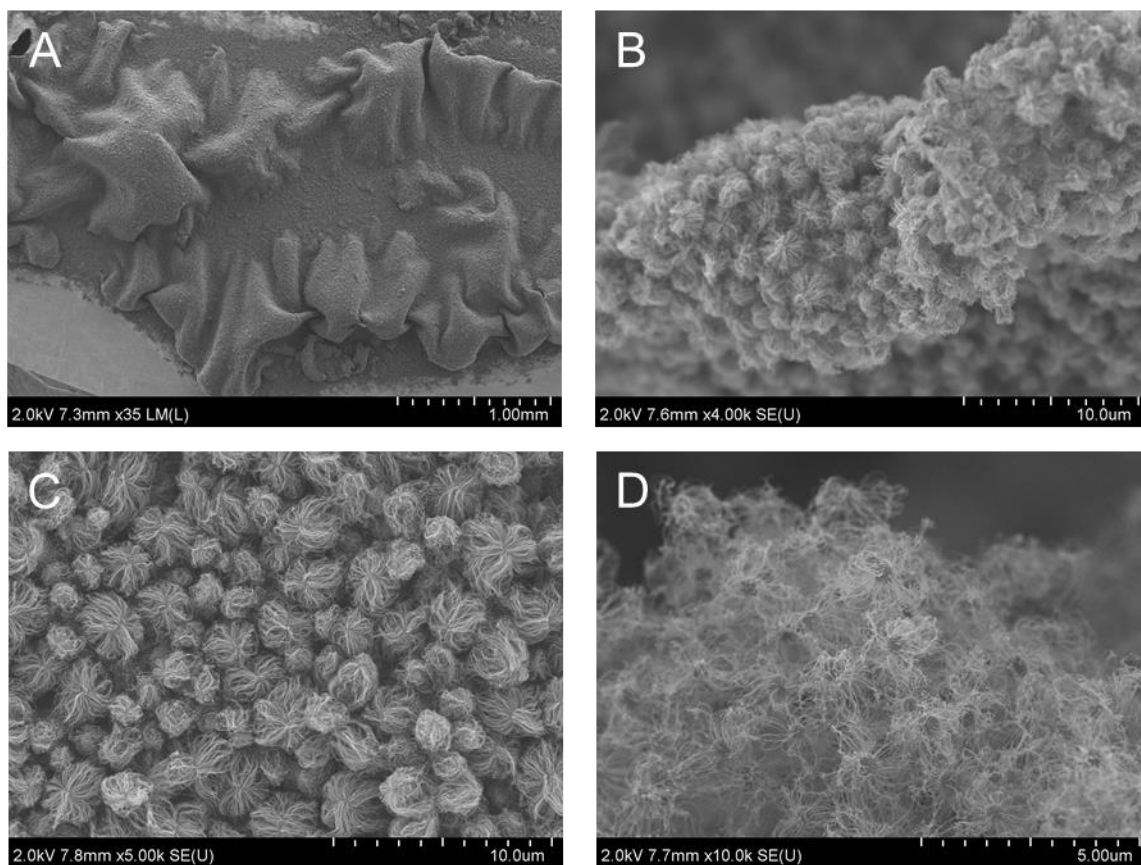

**Figure S7.** SEM images of CNT hair with different rate of magnification obtained using *s*20-FeO<sub>x</sub>/ZrO<sub>2</sub>-M catalyst at 730°C under 65 Pa with 10 sccm ethyne gas flow for 10 s.



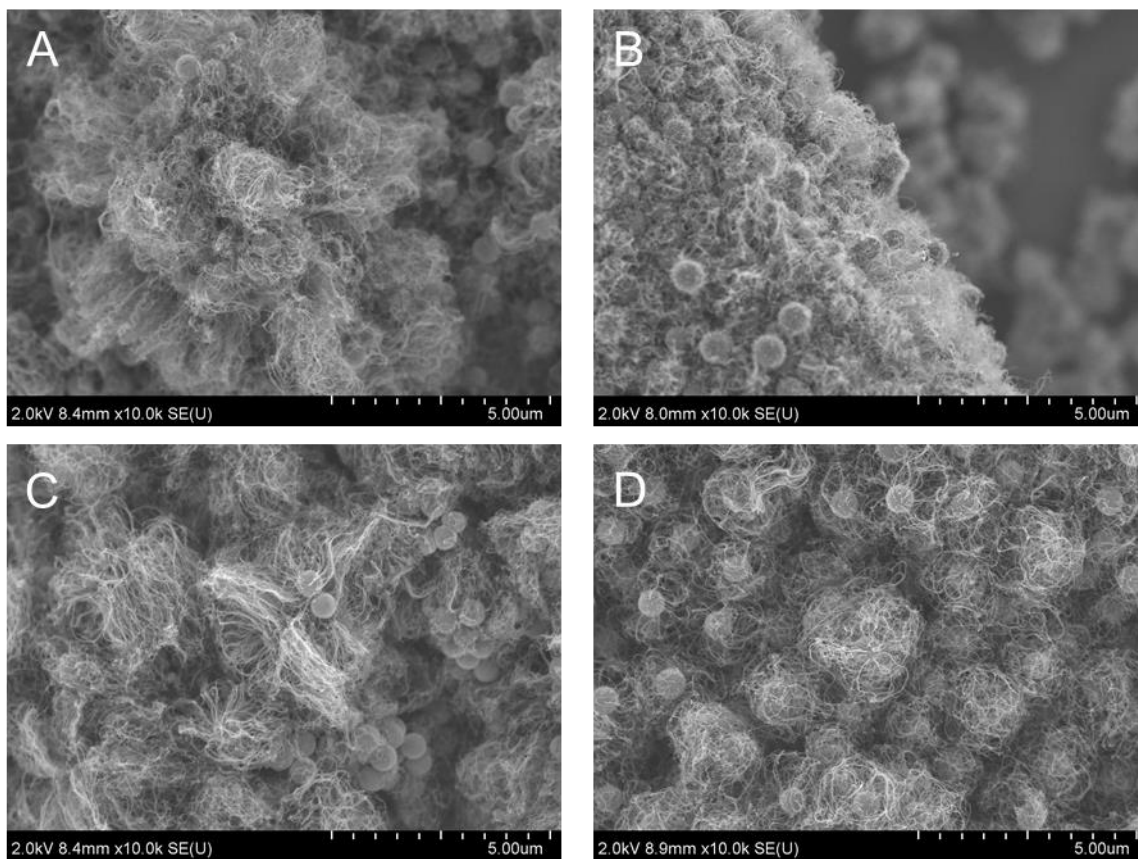

**Figure S8.** SEM images of CNT hair with different rate of magnification obtained using *i*20-FeO<sub>x</sub>/ZrO<sub>2</sub>-M catalyst at 730°C under 65 Pa with 10 sccm ethyne gas flow for 10 s.

Table S1. Specific surface area of catalyst supports and catalysts

| Support or catalyst                               | Specific surface area (m <sup>2</sup> /g) |
|---------------------------------------------------|-------------------------------------------|
| MARIMO ZrO <sub>2</sub>                           | 216                                       |
| UEP-100 ZrO <sub>2</sub>                          | 88                                        |
| Wako ZrO <sub>2</sub>                             | 20                                        |
| MARIMO TiO <sub>2</sub>                           | 180                                       |
| MARIMO SnO <sub>2</sub>                           | 220                                       |
| MARIMO CeO <sub>2</sub>                           | 152                                       |
| <hr/>                                             |                                           |
| <i>s</i> 5-FeO <sub>x</sub> /ZrO <sub>2</sub> -M  | 269                                       |
| <i>s</i> 10-FeO <sub>x</sub> /ZrO <sub>2</sub> -M | 208                                       |
| <i>s</i> 20-FeO <sub>x</sub> /ZrO <sub>2</sub> -M | 198                                       |
| <i>s</i> 30-FeO <sub>x</sub> /ZrO <sub>2</sub> -M | 186                                       |
| <i>s</i> 50-FeO <sub>x</sub> /ZrO <sub>2</sub> -M | 182                                       |
| <i>s</i> 20-CoO <sub>x</sub> /ZrO <sub>2</sub> -M | 196                                       |
| <i>s</i> 20-NiO <sub>x</sub> /ZrO <sub>2</sub> -M | 208                                       |
| <i>s</i> 30-NiO <sub>x</sub> /ZrO <sub>2</sub> -M | 36                                        |
| <i>s</i> 50-NiO <sub>x</sub> /ZrO <sub>2</sub> -M | 9                                         |
| <i>s</i> 70-NiO <sub>x</sub> /ZrO <sub>2</sub> -M | 6                                         |
| <i>s</i> 50-FeO <sub>x</sub> /CeO <sub>2</sub> -M | 8                                         |

**Table S2.** Elemental analysis of catalysts by STEM/SEM-EDX

| Sample name                                  | Catalyst metal oxide | Support metal       | Atomic ratio of catalyst metal/ support metal in precursor solution | Atomic ratio in catalyst by STEM/SEM-EDX (%) |                    |                    |                    |                    |
|----------------------------------------------|----------------------|---------------------|---------------------------------------------------------------------|----------------------------------------------|--------------------|--------------------|--------------------|--------------------|
|                                              |                      |                     |                                                                     | Fe                                           | Co,                | Ni                 | Zr                 | Ce                 |
| <i>s5-FeO<sub>x</sub>/ZrO<sub>2</sub>-M</i>  | FeO <sub>x</sub>     | ZrO <sub>2</sub> -M | 5/95                                                                | 4.6 <sup>a)</sup>                            | —                  | —                  | 95.4 <sup>a)</sup> | —                  |
| <i>s10-FeO<sub>x</sub>/ZrO<sub>2</sub>-M</i> | FeO <sub>x</sub>     | ZrO <sub>2</sub> -M | 10/90                                                               | 9.0 <sup>a)</sup>                            | —                  | —                  | 91.0 <sup>a)</sup> | —                  |
| <i>s20-FeO<sub>x</sub>/ZrO<sub>2</sub>-M</i> | FeO <sub>x</sub>     | ZrO <sub>2</sub> -M | 20/80                                                               | 17.7 <sup>a)</sup>                           | —                  | —                  | 82.3 <sup>a)</sup> | —                  |
| <i>s30-FeO<sub>x</sub>/ZrO<sub>2</sub>-M</i> | FeO <sub>x</sub>     | ZrO <sub>2</sub> -M | 30/70                                                               | 27.2 <sup>b)</sup>                           | —                  | —                  | 72.8 <sup>b)</sup> | —                  |
| <i>s50-FeO<sub>x</sub>/ZrO<sub>2</sub>-M</i> | FeO <sub>x</sub>     | ZrO <sub>2</sub> -M | 50/50                                                               | 47.3 <sup>b)</sup>                           | —                  | —                  | 52.7 <sup>b)</sup> | —                  |
| <i>s20-CoO<sub>x</sub>/ZrO<sub>2</sub>-M</i> | CoO <sub>x</sub>     | ZrO <sub>2</sub> -M | 20/80                                                               | —                                            | 13.2 <sup>a)</sup> | —                  | 86.8 <sup>a)</sup> | —                  |
| <i>s20-NiO<sub>x</sub>/ZrO<sub>2</sub>-M</i> | NiO <sub>x</sub>     | ZrO <sub>2</sub> -M | 20/80                                                               | —                                            | —                  | 17.9 <sup>b)</sup> | 82.1 <sup>b)</sup> | —                  |
| <i>s30-NiO<sub>x</sub>/ZrO<sub>2</sub>-M</i> | NiO <sub>x</sub>     | ZrO <sub>2</sub> -M | 30/70                                                               | —                                            | —                  | 31.5 <sup>b)</sup> | 68.5 <sup>b)</sup> | —                  |
| <i>s50-NiO<sub>x</sub>/ZrO<sub>2</sub>-M</i> | NiO <sub>x</sub>     | ZrO <sub>2</sub> -M | 50/50                                                               | —                                            | —                  | 46.4 <sup>b)</sup> | 53.6 <sup>b)</sup> | —                  |
| <i>s70-NiO<sub>x</sub>/ZrO<sub>2</sub>-M</i> | NiO <sub>x</sub>     | ZrO <sub>2</sub> -M | 70/30                                                               | —                                            | —                  | 67.4 <sup>b)</sup> | 32.6 <sup>b)</sup> | —                  |
| <i>s50-FeO<sub>x</sub>/CeO<sub>2</sub>-M</i> | FeO <sub>x</sub>     | CeO <sub>2</sub> -M | 50/50                                                               | 46.0 <sup>a)</sup>                           | —                  | —                  | —                  | 54.0 <sup>a)</sup> |

<sup>a)</sup> By STEM-EDX

<sup>b)</sup> By SEM-EDX

**Table S3.** Elemental analysis of catalysts by STEM/SEM-EDX

| Sample name                                       | Catalyst metal oxide | Support metal       | Atomic ratio of catalyst metal/<br>support metal in precursor solution | Atomic ratio in catalyst by STEM/SEM-EDX (%) |                   |                    |                    |                    |                    |
|---------------------------------------------------|----------------------|---------------------|------------------------------------------------------------------------|----------------------------------------------|-------------------|--------------------|--------------------|--------------------|--------------------|
|                                                   |                      |                     |                                                                        | Fe                                           | Ni                | Zr,                | Ti,                | Sn                 | Ce                 |
| <i>i</i> 8-NiO <sub>x</sub> /ZrO <sub>2</sub> -M  | NiO <sub>x</sub>     | ZrO <sub>2</sub> -M | 7.6/92.4                                                               | —                                            | 6.9 <sup>a)</sup> | 93.1 <sup>a)</sup> | —                  | —                  | —                  |
| <i>i</i> 5-FeO <sub>x</sub> /ZrO <sub>2</sub> -M  | FeO <sub>x</sub>     | ZrO <sub>2</sub> -M | 5/95                                                                   | 4.9 <sup>b)</sup>                            | —                 | 95.1 <sup>b)</sup> | —                  | —                  | —                  |
| <i>i</i> 10-FeO <sub>x</sub> /ZrO <sub>2</sub> -M | FeO <sub>x</sub>     | ZrO <sub>2</sub> -M | 10/90                                                                  | 11.2 <sup>b)</sup>                           | —                 | 88.8 <sup>b)</sup> | —                  | —                  | —                  |
| <i>i</i> 20-FeO <sub>x</sub> /ZrO <sub>2</sub> -M | FeO <sub>x</sub>     | ZrO <sub>2</sub> -M | 20/80                                                                  | 15.4 <sup>a)</sup>                           | —                 | 84.6 <sup>a)</sup> | —                  | —                  | —                  |
| <i>i</i> 30-FeO <sub>x</sub> /ZrO <sub>2</sub> -M | FeO <sub>x</sub>     | ZrO <sub>2</sub> -M | 30/80                                                                  | 27.2 <sup>b)</sup>                           | —                 | 72.8 <sup>b)</sup> | —                  | —                  | —                  |
| <i>i</i> 50-FeO <sub>x</sub> /ZrO <sub>2</sub> -M | FeO <sub>x</sub>     | ZrO <sub>2</sub> -M | 50/80                                                                  | 47.3 <sup>b)</sup>                           | —                 | 52.7 <sup>b)</sup> | —                  | —                  | —                  |
| <i>i</i> 20-FeO <sub>x</sub> /ZrO <sub>2</sub> -W | FeO <sub>x</sub>     | ZrO <sub>2</sub> -W | 20/80                                                                  | 14.8 <sup>a)</sup>                           | —                 | 85.2 <sup>a)</sup> | —                  | —                  | —                  |
| <i>i</i> 20-FeO <sub>x</sub> /ZrO <sub>2</sub> -U | FeO <sub>x</sub>     | ZrO <sub>2</sub> -U | 20/80                                                                  | 13.6 <sup>a)</sup>                           | —                 | 86.4 <sup>a)</sup> | —                  | —                  | —                  |
| <i>i</i> 20-FeO <sub>x</sub> /TiO <sub>2</sub> -M | FeO <sub>x</sub>     | TiO <sub>2</sub> -M | 20/80                                                                  | 17.6 <sup>b)</sup>                           | —                 | —                  | 82.4 <sup>b)</sup> | —                  | —                  |
| <i>i</i> 20-FeO <sub>x</sub> /SnO <sub>2</sub> -M | FeO <sub>x</sub>     | SnO <sub>2</sub> -M | 20/80                                                                  | 15.7 <sup>b)</sup>                           | —                 | —                  | —                  | 84.3 <sup>b)</sup> | —                  |
| <i>i</i> 20-FeO <sub>x</sub> /CeO <sub>2</sub> -M | FeO <sub>x</sub>     | CeO <sub>2</sub> -M | 20/80                                                                  | 16.5 <sup>b)</sup>                           | —                 | —                  | —                  | —                  | 83.5 <sup>b)</sup> |

<sup>a)</sup> By STEM-EDX<sup>b)</sup> By SEM-EDX
